# Supplementary material for: Testing for a unit root against ESTAR stationarity
Source: publisher site journal article supplement (doi:10.1515/snde-2016-0076), 2017-06-16
Supplement: Supplementary file 1 [file snde-2016-0076_suppl.zip]

## Sheet: energy
Table: Total Primary Energy Consumption per Capita (Million Btu per Person)
		1980	1981	1982	1983	1984	1985	1986	1987	1988	1989	1990	1991	1992	1993	1994	1995	1996	1997	1998	1999	2000	2001	2002	2003	2004	2005	2006	2007	2008	2009	2010	2011
Afghanistan		1.79355	2.21961	2.56999	3.1114	3.06473	2.95086	3.02906	4.85777	8.47601	8.16836	3.68393	3.47074	2.0945	1.77484	1.63407	1.2992	1.24439	1.1436	1.06932	1.03236	0.97017	0.78571	0.77258	0.64852	0.62709	0.80376	0.97991	1.29373	2.17288	3.43202	4.18734	4.12351
Albania		57.9299	56.7517	55.4502	55.9631	55.4984	54.4043	52.2945	51.1507	51.5402	47.0317	33.2745	29.1809	27.1392	19.2212	22.2424	24.1517	26.4909	23.9627	25.9962	29.6982	30.4546	29.2843	30.7157	37.1033	38.2443	39.9919	39.4305	34.4424	34.6528	37.7998	42.3561	35.5945
Algeria		42.5849	35.0416	47.8577	51.9014	54.0087	47.3956	46.8975	48.6809	50.5144	47.7571	49.4036	52.5782	49.1526	39.863	44.5581	46.1405	43.9164	40.86	42.1023	41.436	40.4252	40.4212	40.4279	40.3562	38.8769	45.1399	46.1739	47.5091	50.3867	52.3327	52.0829	54.9678
American Samoa		182.831	205.983	277.185	168.369	187.453	168.69	167.577	163.856	154.872	171.071	171.07	166.245	165.543	155.118	152.262	146.514	145.714	143.482	141.054	138.818	135.656	136.41	139.193	139.717	139.163	148.602	151.924	152.743	153.987	154.379	155.169	88.9798
Angola		8.07121	7.83572	8.11611	8.43219	7.32741	8.70968	8.57169	8.53574	8.66611	8.2607	8.41573	8.5046	8.53862	7.83057	7.72592	7.96381	7.44091	7.9913	7.0685	7.62195	7.1702	9.17841	9.53341	9.77893	10.1023	9.99647	10.9127	12.2448	13.6197	15.525	16.7302	16.3084
Antigua and Barbuda		87.2699	77.8448	104.488	63.2582	72.9176	71.524	71.7543	87.5969	90.0631	90.3688	94.8259	93.6495	91.7373	88.7078	97.9894	98.8175	96.6555	98.7198	96.9186	95.3014	96.2706	94.8076	93.8928	98.1104	104.247	111.956	112.605	108.555	110.027	116.026	117.296	115.938
Argentina		57.8259	55.3683	57.0377	56.8246	60.7712	56.7895	60.922	61.7127	60.9588	59.5594	56.7293	58.8476	60.2709	57.2636	64.3671	65.5375	67.1003	68.2506	70.5215	70.5304	71.4801	69.3048	65.3132	69.4597	71.7755	78.9123	83.4066	83.5481	86.1374	83.81	85.5577	87.9788
Australia		187.66	189.269	190.884	192.762	208.434	207.963	204.293	212.815	208.475	216.926	219.013	215.628	218.859	222.357	220.526	224.541	231.598	247.069	246.057	255.105	253.677	259.324	264.062	268.235	276.328	287.825	287.85	285.842	285.089	283.339	276.281	282.554
Austria		145.138	143.589	136.634	137.722	141.006	143.902	143.145	136.236	146.7	148.156	150.813	156.376	151.65	155.304	153.557	160.127	166.019	167.77	170.781	170.991	169.903	176.287	176.992	178.658	183.603	190.589	189.755	187.357	187.366	178.974	185.761	179.116
Bahamas, The		285.584	296.392	249.156	184.038	163.358	145.545	141.493	154.468	142.189	159.482	167.93	146.414	120.704	115.059	138.615	160.413	177.684	174.308	194.191	173.059	168.048	163.111	162.527	194.26	194.525	221.774	220.221	207.755	141.066	158.254	156.789	150.511
Bahrain		395.652	434.284	444.523	453.137	420.807	484.186	502.441	581.898	485.162	479.694	506.941	549.506	447.521	500.563	499.346	487.276	476.799	548.692	562.564	556.993	556.976	561.262	556.243	522.06	493.842	498.965	497.092	484.4	482.867	477.381	467.971	451.153
Bangladesh		1.45529	1.47992	1.56209	1.42582	1.66542	1.69381	1.80177	1.94795	2.11734	2.28206	2.25837	2.25847	2.47497	2.54015	2.84082	3.14358	3.13206	3.21219	3.28305	3.58313	3.8127	4.10894	4.27154	4.56685	4.78025	5.00135	5.3615	5.57017	5.92145	6.32695	6.08998	6.41709
Barbados		57.3944	60.6292	60.2484	63.296	60.7222	66.6511	70.7107	66.7836	63.2963	67.9072	70.1517	70.5144	70.946	66.8755	67.5039	68.9007	61.0223	75.2897	77.3218	78.8824	86.8733	83.4061	83.01	84.1411	57.366	77.1337	73.2688	66.0658	61.9299	72.1578	67.5628	66.9407
Belgium		206.401	204.232	192.984	184.24	190.651	200.3	207.414	210.854	209.697	213.18	217.078	224.738	221.145	220.73	233.603	239.161	253.171	258.509	263.336	258.404	265.293	261.981	259.39	268.983	270.869	267.939	265.497	264.882	280.234	256.761	272.471	257.5
Belize		25.721	23.0292	21.1888	20.7069	21.8494	21.2728	24.5597	19.7305	14.4692	19.3937	25.9154	27.9932	23.6092	21.4342	21.2189	25.4099	22.2158	32.7663	31.7885	31.7609	43.2873	56.2021	52.666	52.5702	55.0846	56.8032	59.3397	59.4642	35.8271	37.1733	38.0906	37.6356
Benin		1.90633	1.85759	1.27544	1.81127	1.71176	1.95183	1.83735	1.39573	1.61881	1.68379	1.88901	2.09457	2.27714	2.37016	2.38408	2.52897	2.63586	2.77671	2.88079	3.04948	3.66465	3.58101	3.67257	4.18603	4.72406	4.78976	5.46686	5.75793	6.16985	7.48681	8.1312	8.25809
Bermuda		144.995	124.857	131.743	138.85	134.693	131.86	123.827	173.923	188.991	228.797	160.537	138.573	110.239	117.257	124.384	122.597	123.245	122.418	121.369	120.344	118.965	117.046	117.207	125.762	133.051	140.787	138.71	183.65	126.016	140.737	141.717	141.48
Bhutan		0.3296	0.97423	1.20256	1.06756	0.93629	1.17763	5.07515	17.0913	20.8183	20.4795	21.1964	21.1817	22.4175	22.9401	25.7869	27.8877	30.9696	30.5676	29.1134	28.8849	28.4755	30.2724	33.1489	35.3334	31.5779	35.0604	52.9256	73.6357	78.0988	78.1573	82.3958	77.2903
Bolivia		13.6992	15.0399	13.0634	13.1807	12.5442	11.2796	11.3129	10.8934	12.3592	13.6045	14.0843	13.5361	14.2148	11.9601	15.0086	16.7219	16.0889	17.6028	15.9851	17.5898	19.7582	17.3059	18.3789	22.7231	22.7205	21.7463	22.4342	24.9714	25.0437	24.4166	24.4184	23.8768
Botswana		16.8611	16.5013	14.7969	13.9007	13.8214	17.6521	18.1156	19.9569	20.7464	22.9911	26.0731	26.2424	29.0539	26.5616	27.5922	29.0372	26.085	26.6081	29.5029	29.4017	34.2612	29.9835	29.7862	28.1779	31.6145	33.3347	33.173	31.7173	37.2287	32.7205	36.6242	34.9327
Brazil		33.1313	31.3242	31.0347	30.334	32.4339	33.8311	35.8671	36.0729	36.5173	36.9487	38.5183	39.3171	39.2009	40.1111	41.33	43.147	45.1422	46.8832	47.7256	47.9237	48.7622	47.5989	47.4652	47.2919	48.6869	49.7097	50.3479	52.5011	54.3798	53.536	58.3453	60.1734
Brunei		442.819	441.739	467.711	355.607	304.626	352.215	226.665	352.981	298.617	336.647	297.027	149.246	206.831	178.144	179.39	215.007	195.308	203.198	179.632	197.154	199.523	219.776	249.31	259.406	283.434	330.046	490.472	498.324	508.524	331.001	372.916	378.37
Bulgaria		149.419	148.1	152.819	154.841	155.821	159.761	157.937	157.076	156.906	145.67	132.724	104.069	104.137	95.6099	101.094	111.603	116.219	113.595	106.353	97.7719	110.984	116.828	114.151	116.783	116.375	120.457	124.428	112.328	112.074	98.6685	103.467	109.397
Burkina Faso		0.97053	0.95222	0.93126	0.91152	0.8889	0.82416	0.93925	0.95113	0.94212	0.81594	0.84379	0.93925	0.91913	0.93765	1.06249	1.04973	1.0656	1.6173	1.43658	1.43265	1.43391	1.38073	1.374	1.37903	1.3595	1.34975	1.29816	1.40689	1.9791	1.6281	1.64735	1.61655
Burma (Myanmar)		2.08488	2.10843	2.29123	2.57531	2.74481	2.81912	2.3698	2.30764	2.15636	2.22934	2.11666	2.05004	2.10942	2.12521	2.56145	2.67139	2.66174	2.80182	3.00746	3.03335	3.53077	3.44758	3.86829	4.29311	4.35797	5.66967	5.2258	5.59925	4.99109	4.56119	4.50718	4.98039
Burundi		0.36989	0.40194	0.34682	0.42927	0.53823	0.56298	0.56059	0.62063	0.89159	0.93403	0.99039	1.06864	0.98574	0.75027	1.17174	1.0681	1.07668	1.08259	1.04612	0.99746	0.96441	1.01054	0.99779	0.96426	0.84894	0.81347	0.76054	0.70008	0.45497	0.46613	0.47047	0.45535
Cambodia		0.65989	0.67761	0.73125	0.74605	0.79781	0.79802	0.80649	0.7887	0.79301	0.76806	0.74976	0.74385	0.73331	0.70007	0.69552	1.88385	2.03646	2.33816	2.68018	2.6845	2.7613	3.17372	3.36278	3.61573	3.97121	4.15751	4.50249	4.78354	5.33034	4.66101	4.23279	5.10176
Cameroon		5.37825	5.76562	6.51553	6.29953	6.19852	6.27175	6.63858	6.11865	5.92029	6.69316	6.53714	6.42338	6.26618	4.62774	5.62011	5.61202	5.45105	5.59799	5.46605	5.21841	5.30035	5.19858	4.85121	5.06198	5.13974	4.96873	5.59558	5.48272	5.84192	5.75075	6.47196	6.08944
Canada		398.355	385.121	365.305	361.006	380.697	391.353	391.326	398.716	411.008	409.107	395.131	395.411	401.512	404.25	409.931	411.39	418.071	417.376	404.079	420.772	418.691	408.711	412.389	421.18	428.612	426.473	419.985	416.076	406.955	389.974	384.598	393.737
Cape Verde		15.3114	15.0799	6.56387	6.35634	7.63554	7.43798	2.49326	2.72297	3.88361	4.10005	4.30116	4.33911	4.45372	3.75222	4.7247	4.50892	4.66085	4.56446	4.48973	4.39759	7.38698	4.89113	5.10432	4.99156	9.34713	7.9307	8.79008	10.1468	10.4657	11.0041	10.8423	10.858
Cayman Islands		84.5334	86.4342	83.5403	78.8536	77.4725	76.3696	74.5615	73.8991	156.079	154.674	150.385	153.434	150.005	128.478	142.117	148.771	144.168	139.629	137.484	133.099	127.502	125.127	121.5	122.338	127.734	130.379	144.387	162.158	199.058	157.806	155.009	147.636
Central African Republic		1.1664	1.38573	1.44612	1.47734	1.37999	1.31784	1.53981	1.37275	1.41114	1.31844	1.37414	1.38782	1.37705	1.36188	1.39607	1.36485	1.35123	1.34998	1.33511	1.30439	1.35405	1.35364	1.36928	1.34264	1.34622	1.29529	1.33113	1.39231	1.42273	1.28341	1.254	1.24708
Chad		0.89952	0.86048	0.82085	0.78151	0.37034	0.43742	0.76604	0.64506	0.41844	0.41567	0.84332	0.76498	0.74073	0.30476	0.38142	0.36504	0.36162	0.35345	0.34316	0.33295	0.35041	0.3467	0.34683	0.33456	0.29849	0.32124	0.33689	0.38312	0.36788	0.35224	0.34508	0.34302
Chile		38.8755	37.7439	33.0318	32.7934	34.3614	33.658	33.7043	34.2241	37.4609	41.1634	45.6799	44.3986	48.0408	50.1996	53.162	57.1354	60.6859	67.6005	65.2185	67.9806	67.228	68.2415	69.2702	72.6473	76.9441	80.1717	81.544	79.9824	82.218	81.3132	78.8658	82.9273
China		17.5554	17.2435	17.7118	18.4861	19.6166	20.8008	21.6254	22.6402	23.7638	23.8428	23.5023	24.1994	24.8511	24.6721	27.6439	28.4383	29.8857	29.0484	29.2391	29.4815	31.4685	32.423	34.0319	38.9147	44.8588	49.6407	53.9691	57.1145	59.9357	64.9662	71.359	77.5415
Colombia		26.1482	26.2896	27.5585	27.3641	29.3062	29.0257	29.6211	26.5075	28.9361	29.3593	26.8452	28.5679	28.2773	28.411	30.6477	29.9598	32.0634	32.6307	32.5087	30.5782	30.276	29.7378	29.1459	29.6979	29.7075	30.5737	31.3516	30.8097	30.9035	30.6577	31.0716	33.6753
Comoros		1.86538	1.81742	1.77514	1.73344	1.71797	1.43121	1.40022	2.17114	2.22054	2.17585	2.74912	2.58683	2.52077	1.94736	2.50671	2.44379	2.38816	2.33777	2.36804	2.30982	2.4884	2.51189	2.54205	2.49179	2.4973	2.57974	2.55415	3.10534	3.25148	3.10539	2.63856	2.9075
Congo (Brazzaville)		7.13145	8.24382	7.21959	6.24013	6.39602	8.89106	7.55283	8.92044	7.0549	7.85748	8.50371	7.55634	6.97475	5.23166	5.66132	5.55477	5.66046	5.45582	4.98123	3.98392	4.19506	4.93742	4.62266	5.03294	5.2745	7.38779	7.67505	8.90527	10.1501	11.9209	17.6432	17.8557
Congo (Kinshasa)		3.12696	3.11227	3.06969	3.0978	2.95418	2.92957	3.024	2.79253	2.99457	2.96775	2.71459	2.59614	2.75306	2.48085	2.19503	2.31846	2.29367	2.04531	1.89415	1.82599	1.74871	1.52936	1.43296	1.40353	1.62432	1.62981	1.6106	1.66329	1.57978	1.55343	1.67064	1.53898
Cook Islands		23.1538	47.4329	47.1985	47.4584	46.779	47.3332	42.9919	42.9311	42.2424	36.8255	36.339	29.9262	35.9307	36.072	36.3496	36.4643	36.7232	37.4575	38.5156	39.7083	49.1101	51.068	53.0156	54.9948	62.9783	72.0238	78.3764	75.7454	83.9033	84.877	87.6993	92.2703
Costa Rica		24.12	24.2665	23.0156	24.587	23.0211	22.4431	21.3874	23.0371	24.2991	25.6926	24.6105	25.6503	29.3532	29.971	30.713	30.7439	30.2834	32.6988	32.7377	35.1241	36.3255	36.7927	38.1325	38.8802	39.514	38.6116	40.9406	42.5435	44.2215	41.4567	41.4471	40.9159
Cote dIvoire (IvoryCoast)		8.5973	9.11764	8.24863	7.69054	6.56836	7.46352	7.33588	7.7961	7.86145	7.60612	6.23697	5.0497	4.75129	4.55439	5.19746	5.47447	6.63716	6.08578	6.006	7.60869	7.86314	6.35315	6.05269	6.00847	6.21678	5.99112	5.8987	6.0551	6.65471	6.30299	5.82898	5.88402
Cuba		47.2732	47.7742	51.217	46.5256	47.7029	48.0976	49.3804	48.2463	48.5397	49.0536	47.7569	43.6559	38.294	34.5175	38.1249	38.6239	39.3644	43.2117	40.9639	41.4292	41.5176	41.9628	41.9516	41.508	46.4106	40.2671	31.8064	33.3498	31.5027	37.3218	36.0382	36.9244
Cyprus		66.662	56.767	59.9312	65.4338	65.9397	68.8536	70.2614	77.3439	76.0612	90.0924	93.5038	91.5356	103.166	90.1113	112.138	109.23	104.779	104.801	111.728	116.072	112.129	120.623	116.86	115.658	119.144	118.59	120.221	120.384	122.628	116.125	110.191	107.186
Denmark		168.466	146.158	144.332	136.704	140.603	159.18	159.169	162.347	157.021	146.636	149.649	163.99	153.661	162.21	168.588	168.89	186.133	178.423	173.852	168.176	164.203	166.018	159.563	166.722	159.958	155.766	165.462	160.941	153.523	144.428	150.243	142.89
Djibouti		67.4574	51.3443	49.9388	35.4969	29.2436	28.3111	24.5722	24.313	23.3134	52.0632	46.5982	42.62	43.1163	42.3964	44.3719	43.6922	42.5083	41.3499	39.4587	37.9091	36.8244	36.1074	34.9885	37.0464	39.3929	38.4936	34.9596	33.4015	23.832	23.0059	22.5117	24.3738
Dominica		6.44893	8.35879	8.18401	8.98958	9.17708	9.93391	9.91605	10.7598	13.4962	14.3476	14.4432	14.4279	14.3415	14.241	16.8845	18.8647	18.9851	19.3333	21.0564	21.7025	20.9204	24.5628	26.6825	28.307	26.1737	22.1414	26.9349	26.6323	29.3909	28.5251	28.4639	32.8252
Dominican Republic		15.3166	14.8171	15.2827	17.806	15.0563	16.7381	16.7337	18.9437	19.6732	18.3592	19.5839	19.5493	19.9028	17.1487	19.2346	20.5083	21.8503	22.6417	22.9825	26.1702	27.6479	28.3953	28.8337	32.141	30.0804	29.6668	30.2675	31.1602	32.7613	29.0051	29.4447	32.3384
Ecuador		23.5479	23.723	25.2197	22.9536	23.5555	24.3442	25.4844	24.4938	24.7388	23.6059	24.5987	25.7043	28.2546	23.6512	28.5689	27.3518	28.8382	29.0748	29.055	27.3778	27.6898	28.5764	28.4663	28.7049	29.3269	30.9481	33.2446	36.6819	40.199	40.17	40.2485	39.8391
Egypt		16.5686	18.7423	20.2901	22.3276	23.7698	24.3435	24.2075	24.7936	24.639	25.0994	26.0717	25.6459	25.2044	23.8999	26.7813	26.9364	28.9012	29.3043	29.6285	30.1566	30.7721	33.4223	33.1875	34.9825	36.3663	37.8465	34.9962	36.3621	40.5472	40.4238	40.3618	41.6405
El Salvador		9.90524	9.18827	9.27649	9.36653	9.81014	9.66034	10.1383	9.65033	10.3529	10.3438	10.5111	10.2168	11.4101	10.6936	12.709	15.3879	15.4895	15.3615	17.3178	17.9364	17.2355	17.8858	17.6166	19.1444	18.7301	19.6903	20.3839	20.5615	20.9051	19.6443	20.5844	21.3878
Equatorial Guinea		3.3076	3.10881	3.70568	3.5251	3.36858	3.70515	3.621	3.39635	3.29827	4.66323	4.65699	4.76019	4.39622	4.49388	4.48496	4.34912	4.32745	4.53365	5.99974	5.83059	8.8004	6.9919	94.8919	94.4801	10.6988	88.7853	86.4888	98.0334	107.365	100.787	104.693	102.014
Ethiopia		0.83506	0.81016	0.8621	0.95353	0.96194	1.11914	1.06874	1.16539	1.10378	1.12997	1.11899	0.93002	1.20282	1.05723	0.81443	0.8535	0.6917	0.67977	0.85745	0.97733	1.0023	1.05021	1.09283	1.15531	1.17898	1.22348	1.34605	1.41845	1.62671	1.5594	1.58963	1.75687
Faroe Islands		152.641	11.6785	11.5772	11.5654	11.3521	11.2324	165.963	171.687	180.165	196.678	209.643	193.459	193.953	193.622	209.673	224.298	227.928	227.611	226.345	222.016	223.242	219.423	221.518	218.735	221.089	224.875	242.617	233.015	233.636	231.896	222.094	228.591
Fiji		24.0898	24.3754	23.46	19.651	21.179	20.947	24.7649	20.4805	20.6179	23.4302	25.6205	21.7033	22.0492	20.769	23.761	25.0935	25.627	25.2959	24.3433	26.5631	30.2084	32.3928	37.0024	44.3495	47.6773	46.5339	48.1718	47.5277	41.5448	27.9872	26.7401	26.3528
Finland		203.405	206.227	187.781	186.132	193.642	195.169	201.069	215.852	214.381	215.782	223.776	226.019	225.247	226.379	233.088	221.503	223.307	229.568	238.051	235.196	240.309	241.649	242.534	253.127	258.397	242.501	253.774	254.945	248.501	230.513	246.933	233.762
France		152.074	145.473	139.724	141.302	145.095	147.626	149.416	150.901	149.823	153.27	156.66	166.181	168.189	165.4	164.275	168.049	175.228	171.681	174.653	175.873	177.213	180.063	177.772	178.361	180.378	180.429	179.674	175.735	176.203	166.502	169.78	165.941
French Guiana		73.5714	63.2714	80.6429	72.625	57.9125	51.7	60.2342	59.7791	64.1904	72.333	79.222	89.5978	66.2112	86.8063	83.4814	88.8209	88.5782	83.2696	79.6902	77.698	76.568	104.716	104.652	106.26	102.028	103.476	102.396	98.2415	91.5981	82.2327	90.8998	87.8928
French Polynesia		20.6831	29.598	38.9113	50.9156	74.6536	63.6701	77.261	76.6155	75.0816	73.5238	68.9385	67.0713	64.4323	59.1915	50.5675	52.6547	52.1987	51.4212	51.3016	47.5816	45.453	44.3514	46.1149	54.8461	54.4562	58.251	62.6741	61.9656	66.3088	63.2425	66.5234	61.0511
Gabon		39.8147	43.8249	40.0732	53.2238	46.3537	38.074	33.3832	37.8343	39.2376	47.8747	46.1819	46.1297	46.2171	40.0221	42.5563	39.1104	39.5265	40.5851	38.2475	33.4145	29.7994	30.1018	29.187	29.1712	28.8023	27.4357	29.6069	30.7172	33.3567	34.6263	32.2283	31.7641
Gambia, The		3.4255	3.32006	3.22653	3.13563	3.31416	3.13131	2.79847	3.10212	3.06855	2.90383	2.84486	2.8489	2.72502	2.77879	2.95637	2.65976	2.56214	2.48635	2.5489	2.47538	2.69193	2.81582	2.80594	2.76355	2.70687	2.73052	2.85087	3.43019	3.64397	3.63743	3.85595	3.42124
Ghana		7.71865	7.30343	7.09812	4.45159	3.91716	4.30422	5.50695	5.8706	6.28033	6.77347	6.45537	6.56485	6.98168	6.40923	6.75472	6.75639	7.01142	6.79559	5.21766	6.23498	7.5267	7.32719	6.60843	6.18507	7.01784	7.07665	6.95669	6.03895	6.81328	7.48066	8.25904	8.45835
Gibraltar		255.941	282.674	255.026	204.869	191.244	434.98	642.474	642.868	816.331	691.831	750.54	801.437	1419.63	1494.46	1558.09	1561.98	1563.44	1563.31	1803.75	1570.68	3429.92	1829.55	1849.71	1889.1	1932.44	1982.79	2023.74	2080.5	1995.29	2175.57	3951.29	1911.8
Greece		77.9579	76.7966	74.4035	75.9863	77.6418	81.5217	84.0602	90.0471	95.9255	99.8542	102.517	102.997	98.8115	103.339	104.204	107.477	109.272	114.173	121.123	120.192	126.715	128.091	128.225	135.229	134.039	134.544	138.348	140.098	137.181	130.644	125.548	121.541
Greenland		157.537	146.153	139.703	96.9471	151.907	134.321	86.046	61.9952	141.722	121.093	141.548	140.316	123.895	127.339	128.598	127.998	129.249	131.955	133.611	133.415	135.702	139.369	140.317	140.64	140.952	143.459	146.855	206.563	210.387	184.049	238.26	255.694
Grenada		7.41981	8.29417	9.20856	8.95964	9.19796	9.43487	10.4224	10.8935	11.7431	12.2352	18.9202	18.9491	19.325	18.8712	24.5253	22.6038	24.7173	30.9588	27.6612	27.4969	17.7663	31.1098	33.5646	33.8096	33.8465	34.5564	36.1879	35.6376	39.347	37.1455	36.7772	37.8218
Guadeloupe		20.9703	29.8083	37.3959	38.8	42.3829	37.8672	38.4899	43.1804	46.6557	50.4079	52.8958	53.9911	49.7184	52.6767	58.482	59.4932	58.4277	59.0141	58.6475	58.1677	61.0839	61.6754	62.3944	66.3602	67.0272	69.6141	72.3229	79.4973	81.3119	68.5943	67.9947	68.0943
Guam		498.62	682.419	530.67	486.15	162.742	77.9671	127.251	86.3184	88.3084	81.7755	193.394	212.963	246.639	322.416	464.066	349.43	308.212	348.317	281.824	308.043	252.901	270.627	183.497	210.046	166.449	334.108	351.669	253.633	159.53	253.16	225.47	199.056
Guatemala		10.1011	8.37477	8.31218	8.76385	7.32325	7.99104	8.34417	8.01018	8.38714	8.57596	8.94419	8.48298	9.08615	8.85751	10.5462	10.887	11.0268	11.705	13.288	13.999	14.2111	15.0416	14.6614	15.7194	15.8318	16.0782	16.0372	16.3206	15.6551	16.3851	15.7196	17.5438
Guinea		3.08979	2.97268	2.95905	2.89932	2.8388	2.3703	2.96549	3.03169	3.02321	2.86594	3.57339	2.65295	2.61296	2.39564	2.59448	2.50511	2.4462	2.53882	2.54156	2.57076	2.6053	2.78553	2.80783	2.51593	2.63384	2.57633	2.46732	2.44952	2.46692	2.43102	2.3351	2.21725
Guinea-Bissau		1.56167	1.52158	1.51132	1.47691	1.94733	2.04844	1.57134	2.82792	3.08278	3.15481	3.89995	3.88965	3.80523	3.16091	3.91112	3.78135	3.73684	3.65966	3.57545	3.4949	3.78863	3.75212	3.80898	3.83105	3.73594	3.80374	3.69562	3.74062	3.63769	3.63331	3.56097	3.46709
Haiti		2.72289	1.93531	2.49122	2.19219	2.18226	2.44303	2.34578	3.33304	3.55284	3.20813	2.07883	2.04682	2.16514	1.51927	1.35111	2.06531	2.35401	2.76246	2.67392	2.83827	2.86237	3.03599	3.03977	2.96705	2.9692	2.95414	2.97598	3.05994	3.83363	3.41523	3.21941	3.07208
Honduras		9.74819	8.70818	8.58394	8.66709	8.59895	7.90254	8.90302	8.31101	10.0706	11.2959	12.3685	11.9498	11.911	11.4315	11.2992	11.702	12.8462	12.692	13.2929	14.1321	13.5254	14.2374	14.6037	14.6012	15.5575	16.2314	16.6996	17.8853	17.2133	15.9688	16.5957	16.8013
Hong Kong		53.8013	54.706	59.0722	64.1385	65.4907	67.8408	70.9722	78.812	87.7779	90.8488	89.0527	86.0486	95.4129	95.4237	97.7676	100.981	106.394	106.276	111.524	131.006	120.992	127.737	136.87	140.72	155.603	161.232	158.436	169.46	158.684	181.482	192.679	180.7
Hungary		113.252	112.277	112.305	113.542	111.883	116.489	116.902	120.485	119.556	119.871	113.504	108.523	99.8157	99.1082	99.0795	100.465	104.011	101.769	102.885	103.286	100.74	104.35	104.914	107.743	107.759	115.009	113.986	110.738	110.289	103.556	105.393	102.682
Iceland		247.592	243.462	255.627	265.209	279.451	274.036	282.486	289.811	293.554	303.007	307.534	296.762	300.402	311.958	311.793	315.637	337.076	348.491	379.116	406.873	426.617	430.697	439.499	437.967	441.135	440.112	478.53	547.63	700.18	692.613	688.658	688.259
India		5.90005	6.61804	6.63968	6.85306	7.59928	7.78575	8.20383	8.15667	8.73895	9.07485	9.40055	9.80864	10.1778	9.86621	11.0995	12.5403	11.6209	12.0277	12.3723	13.0107	13.2499	13.5226	13.1783	13.394	14.3172	15.1093	15.9468	16.9571	17.2649	18.6433	19.4782	19.747
Indonesia		7.72687	8.2583	8.30537	8.6351	8.93171	9.20811	9.73527	9.96311	10.4946	11.6783	12.6638	13.6628	13.981	14.4617	15.9092	16.3362	17.493	17.6752	16.8191	18.2517	18.0967	17.9222	18.6242	18.5916	19.5114	19.8901	21.4228	23.0481	22.9947	24.3878	25.7618	25.6791
Iran		39.8554	35.9128	39.5043	46.5226	47.5581	49.2918	48.1304	48.5487	49.9029	53.373	53.411	53.485	53.8703	51.2535	58.0902	59.5761	60.8303	67.132	68.4434	71.3438	73.1559	77.5138	83.7814	87.3615	89.6876	103.086	108.324	109.906	113.416	123.165	119.895	122.11
Iraq		39.5999	35.243	32.6249	37.5921	35.4979	36.0995	38.3397	38.6413	45.0402	46.961	50.5908	35.6776	46.9476	45.876	58.0963	57.7901	55.7662	50.1061	49.3417	48.727	47.8059	48.6018	47.6702	41.0023	44.3358	47.5276	45.7906	47.3834	47.378	47.6562	51.5241	49.8907
Ireland		94.9838	90.5679	88.6607	85.1449	87.1502	88.6501	95.9326	95.9819	94.3265	99.984	104.801	108.936	110.107	112.688	117.575	119.596	126.435	132.961	142.591	149.821	157.39	162.623	159.176	154.7	157.851	158.269	162.132	156.676	153.637	135.743	137.459	126.606
Israel		68.829	70.7067	70.8775	68.431	62.5106	64.6613	68.2288	73.1676	74.8879	76.0087	75.77	74.3426	71.7535	83.8772	85.5573	84.2934	82.9383	124.456	123.246	121.535	130.879	125.351	131.749	132.027	132.316	121.58	126.619	128.241	124.325	121.08	129.721	133.462
Italy		108.362	106.209	103.65	101.569	106.035	106.277	107.688	111.638	114.373	117.71	118.555	121.222	120.151	119.569	117.704	122.947	123.207	124.847	128.236	130.227	131.21	131.588	131.778	135.436	137.772	137.691	136.231	133.602	131.538	121.614	126.119	122.994
Jamaica		52.9666	44.08	37.6698	40.0571	32.6183	29.2016	29.3728	31.5608	36.3646	41.6364	44.0867	44.7394	48.6483	46.9063	50.0568	54.4464	55.092	57.3142	57.813	58.7956	55.9601	55.6688	56.488	58.1442	58.3685	55.7385	62.1194	64.814	62.0341	45.217	39.7011	44.6011
Japan		130.109	128.527	123.011	119.838	130.342	129.938	129.305	132.685	140.376	144.181	151.924	155.844	155.58	156.593	162.619	167.094	169.631	173.465	169.912	173.444	176.754	174.644	173.619	173.376	178.258	176.748	179.243	177.615	170.698	161.323	170.823	164.075
Jordan		35.6217	40.631	44.5328	45.8921	45.6999	45.7257	47.425	49.9578	45.102	44.6773	44.5522	37.8561	41.4824	35.2826	44.948	46.2349	47.96	45.3518	47.9979	46.779	48.0958	45.9387	47.0447	50.1569	54.251	56.0931	54.8982	51.6491	51.2914	49.9404	50.3627	42.4268
Kenya		6.06825	6.001	5.73841	5.38153	5.14917	5.22693	5.34665	4.74197	5.16461	5.39274	5.32145	4.7637	4.937	4.71308	5.00134	5.13335	5.20461	4.7527	5.11476	4.77019	4.68176	4.62031	4.67001	4.88171	4.98042	5.2323	5.58753	5.45179	4.95458	5.01422	5.48846	5.40689
Kiribati		5.83982	6.80982	6.67217	6.58888	4.77538	4.7071	4.14463	4.69423	4.55041	4.43683	4.31852	5.06044	4.17037	4.11154	4.07207	4.02254	3.94156	3.86334	3.77643	3.69415	4.11765	4.05097	5.0855	5.00403	4.89911	5.78977	5.6977	6.01235	5.71119	8.85848	8.74114	8.14073
Korea, North		76.337	77.7432	80.1756	82.4415	83.4987	86.2455	84.6185	80.3521	97.1978	78.329	74.9147	71.8452	62.1649	56.388	52.4213	48.2318	41.1093	37.3524	33.7941	36.3195	37.6048	38.1844	36.5452	37.4306	38.1032	39.3035	39.237	33.4815	36.662	34.3436	33.7213	33.775
Korea, South		46.1222	47.0588	46.6042	50.3669	52.8339	56.5093	62.4763	67.6641	74.3036	80.0093	89.5797	100.292	110.074	121.752	130.586	141.014	148.626	160.242	149.515	160.747	167.328	172.344	177.148	182.67	186.441	191.846	194.081	201.358	204.54	205.721	222.555	231.973
Kuwait		351.076	245.876	233.807	248.114	248.393	232.382	249.5	285.586	314.721	339.959	209.45	229.372	248.658	278.061	363.779	355.561	430.481	442.908	454.691	449.125	461.212	435.283	426.058	448.852	458.285	508.179	491.817	489.265	503.774	487.644	526.063	577.255
Laos		3.98209	3.38409	3.39743	3.08324	2.69803	2.56765	2.57489	1.98948	1.81815	2.21895	2.41568	2.46933	2.43964	2.20295	2.34979	2.82656	3.25084	3.40572	4.44548	5.33749	6.38815	6.30926	6.43601	5.89524	6.40265	6.59233	6.75273	7.13282	7.69937	7.40991	11.6457	15.0282
Lebanon		36.13	33.0165	31.4324	31.9367	30.1697	34.1675	32.0038	32.633	29.3926	22.9502	20.7602	33.6763	33.5273	39.1643	47.0367	50.0178	52.1546	59.1687	59.9417	61.0823	61.8029	58.9891	59.5995	61.6972	58.9592	56.1467	50.4363	46.0054	56.666	69.0954	66.1475	70.5354
Lesotho		1.5612	1.37402	1.47681	1.43801	1.40361	1.41141	1.38441	1.35948	0.91078	1.31211	1.67421	1.67352	1.73822	1.73777	1.93342	1.9299	1.9278	1.88218	1.6896	2.44965	3.06612	3.10987	3.19155	3.27934	3.09055	4.02444	4.4553	4.78982	5.10127	5.19494	7.90883	6.70159
Liberia		17.1474	15.3545	14.9882	14.474	12.3144	12.1192	9.49406	7.1899	8.64318	6.86941	3.80451	2.62239	2.54904	2.50945	2.77774	2.80295	2.86128	2.66388	2.45459	2.31109	2.36997	2.43273	2.56227	2.62552	2.6304	2.5413	2.76204	2.88019	2.49142	2.16172	2.04403	2.16576
Libya		129.861	111.792	106.071	109.568	106.308	115.05	120.073	119.779	119.564	120.491	124.21	126.594	115.214	100.214	117.523	120.713	126.723	131.825	123.613	113.523	125.355	129.887	132.884	127.825	138.776	138.611	129.391	125.28	129.283	137.264	153.436	98.49
Luxembourg		389.566	346.72	329.402	313.165	337.456	341.568	338.741	334.73	343.27	367.686	377.521	404.039	396.133	408.149	387.783	339.608	341.365	335.459	324.531	337.596	353.211	365.388	378.296	391.483	434.016	434.278	424.48	411.036	405.469	378.646	397.466	385.807
Macau		27.2782	25.118	25.804	34.5173	36.3577	29.1828	39.7445	42.839	41.3833	43.2046	43.0221	41.7729	41.8233	42.0309	47.1309	46.8125	50.918	51.3296	54.5917	57.1236	51.2035	54.4833	58.9177	60.4703	71.3427	60.3055	70.5247	68.515	61.2136	59.191	51.3277	56.6401
Madagascar		2.17589	1.84403	1.65249	2.04622	1.97906	2.0898	1.47499	1.95136	2.07609	1.52713	1.45963	1.45456	1.49946	1.40141	1.5923	1.60182	1.59635	1.58121	1.57398	1.53216	1.9682	2.06267	2.25663	2.29773	2.42781	2.29191	2.20251	2.17993	1.83334	1.61972	1.57602	1.47949
Malawi		1.90421	1.92606	1.76084	1.5571	1.49767	1.54402	1.50854	1.48461	1.35556	1.4369	1.56132	1.73652	1.68871	1.57189	1.78933	1.85664	1.83919	1.79774	1.86147	1.87484	1.92782	1.88922	1.91907	1.89634	2.05188	2.10217	2.09785	2.09664	2.16073	1.87445	1.9892	1.96872
Malaysia		31.084	31.628	31.8372	34.84	40.3974	44.6835	46.5414	45.4658	46.8856	49.6014	55.0188	59.1474	60.3014	60.2853	71.9554	72.2559	78.6795	78.0201	76.8282	77.5498	85.8446	88.7771	91.1559	89.4588	88.3949	88.2064	89.5452	96.356	100.762	102.047	107.511	108.764
Maldives		1.39334	1.31641	1.27857	1.25264	4.79948	5.09879	6.19115	5.94651	6.13897	5.91548	6.29821	6.00405	5.90909	6.91941	13.4864	18.5231	18.1212	15.6924	16.6269	16.0395	22.1047	23.3129	41.9043	46.1416	31.4316	24.4695	32.6232	35.045	34.2837	36.8126	36.8709	36.3395
Mali		1.02478	1.29426	1.01453	1.01371	1.00983	1.06802	0.8666	0.96418	0.59283	1.00378	0.99476	1.00106	1.01512	1.02074	1.02116	1.00737	0.99162	0.99569	0.98234	0.95509	0.94832	0.92631	0.96251	0.93877	0.94123	0.99797	0.90087	0.89299	0.90597	0.87584	0.85209	1.1344
Malta		51.8638	56.5416	61.3815	44.6065	63.9509	52.8184	60.5838	67.6274	75.4074	81.551	84.8932	85.5703	84.6735	93.8098	96.058	89.2998	92.0253	97.5339	101.263	114.846	100.498	83.9484	100.1	99.3238	100.122	103.427	97.5543	102.958	192.298	216.782	257.502	225.952
Martinique		28.6656	28.0898	27.9122	27.2713	24.1834	28.7966	30.6372	34.339	40.6532	57.0367	60.8709	49.9027	55.2382	68.2704	73.3187	74.4406	74.0251	73.6309	73.2793	72.8008	73.1198	73.3866	73.9652	76.7283	78.4222	82.5504	81.931	84.5496	75.7006	89.2458	88.9092	90.25
Mauritania		5.95273	5.6935	5.64086	5.48589	7.80998	7.54587	4.20388	5.6625	7.09136	8.08391	7.04365	7.24472	22.5291	18.5654	21.6526	21.4425	21.2144	20.9759	20.5298	19.9989	19.8967	19.3953	18.0415	18.0748	14.9958	17.2934	14.458	13.0061	9.13847	8.89618	8.70454	7.88227
Mauritius		14.1727	12.3205	12.101	12.8416	13.2608	14.1497	17.0537	14.9567	20.2866	23.8292	26.1271	25.8818	30.2945	28.0872	29.233	31.6418	31.1638	31.1856	31.7983	34.6783	44.9774	48.8473	44.9153	46.4262	46.8039	48.5753	50.8021	53.677	55.4005	49.7093	55.4973	51.8974
Mexico		54.405	58.7328	60.3076	55.1991	55.5297	57.3456	55.1555	55.7203	55.4893	57.4182	54.8395	57.4528	57.5832	57.3229	58.5684	56.6628	58.0627	58.8769	61.0898	61.4223	63.8564	62.4809	61.9203	62.2157	61.6619	63.1777	64.6081	65.9163	66.1622	62.5329	64.8433	68.26
Mongolia		50.022	44.3176	51.4651	51.5469	50.7652	54.5188	56.6421	58.0467	58.529	53.517	49.1601	56.8947	48.1929	42.5728	39.4883	40.8774	30.3516	24.4585	24.0995	23.4618	23.6996	24.0978	25.34	23.8704	25.1454	25.0395	28.2435	28.8399	30.655	29.6138	31.4386	31.7682
Montserrat		21.7502	24.0095	24.2669	24.481	24.8208	27.2013	27.5847	31.8423	36.1819	36.6823	49.2811	45.8676	54.507	54.9681	55.4971	64.4841	77.4513	111.053	208.724	208.909	189.808	177.397	156.338	187.15	186.162	214.407	228.501	254.876	238.998	226.319	225.434	239.335
Morocco		12.4221	11.7283	11.6516	11.6834	10.8473	11.1907	12.201	11.8417	12.1685	13.122	13.3858	13.5999	13.6786	12.5162	15.77	14.8787	15.4592	15.3777	15.1849	15.7563	15.9003	16.9011	16.929	16.8192	16.6588	17.1486	17.6936	17.985	20.2963	20.6613	23.1124	21.5824
Mozambique		14.4978	5.40818	5.10976	6.70357	2.61324	2.49114	1.34902	1.31206	1.90874	1.56812	1.5677	1.57893	1.52338	1.5731	1.42766	1.41063	1.318	1.53874	1.86805	4.42045	5.59686	7.11759	7.08626	6.81539	5.19891	4.13859	6.55602	8.68631	7.95267	8.3573	8.24943	8.90591
Nauru		246.174	243.887	239.495	235.056	238.204	230.715	226.148	221.145	215.815	211.866	216.407	212.443	212.653	212.715	213.279	217.619	216.826	216.583	216.21	216.451	216.321	216.277	224.491	224.265	226.268	230.343	236.471	252.331	241.737	257.487	255.987	219.942
Nepal		0.56362	0.50632	0.6334	0.69372	0.78689	0.66495	0.81843	0.9456	0.92409	0.90553	0.9486	1.12521	1.17469	1.10151	1.27362	1.38734	1.52007	1.59846	2.09193	2.34217	2.3392	2.45198	2.27019	2.33222	2.36204	2.56012	2.46516	2.50912	2.57876	2.76508	2.91418	3.03505
Netherlands		226.419	210.918	200.587	195.797	199.643	207.497	215.487	220.152	219.314	219.292	221.273	231.81	228.324	231.479	227.847	230.94	238.861	235.591	234.145	232.817	237.874	245.019	244.024	246.741	252.848	259.248	253.795	259.099	257.183	246.439	257.58	244.793
Netherlands Antilles		1023.12	948.513	904.411	820.207	763.343	635.419	822.997	829.738	768.314	806.833	782.583	737.082	719.622	577.667	737.041	768.614	757.785	795.34	785.302	749.958	741.868	743.513	704.922	669.265	666.586	695.955	722.677	754.019	821.022	763.745	767.004	660.761
New Caledonia		197.643	186.063	143.908	121.595	144.044	148.391	143.51	137.5	147.321	158.365	147.383	147.01	147.55	140.961	138.657	137.881	139.543	127.174	127.91	128.075	140.826	135.658	147.041	148.422	155.566	151.151	172.058	171.351	167.356	170.763	167.484	166.304
New Zealand		156.968	154.74	156.351	162.191	170.816	173.076	186.662	187.579	200.637	199.667	206.812	205.497	200.967	204.889	214.984	213.163	207.871	210.039	205.399	214.429	218.578	219.465	218.813	211.734	217.179	209.013	205.949	204.943	204.816	199.257	203.26	202.365
Nicaragua		11.6898	11.577	11.2138	10.4256	10.319	11.2356	10.7091	10.8617	10.7804	11.4386	10.1572	9.19713	9.9297	9.07457	9.80002	10.1912	10.4495	10.5606	11.1692	11.8412	11.3783	11.9336	12.1424	12.1943	12.7621	13.4903	13.2119	13.2347	13.063	12.6598	12.904	13.0843
Niger		1.50174	1.52505	1.56424	1.57565	1.61915	1.58427	1.30369	1.40624	1.83607	1.86712	1.86144	1.81912	1.79102	1.75293	1.74566	1.68655	1.62131	1.55215	1.50928	1.44135	1.40927	1.39647	1.43185	1.42085	1.47566	1.34896	1.27486	1.27508	0.93068	1.16721	1.21124	1.16424
Nigeria		5.64332	6.71359	6.50109	6.38605	6.72645	7.06172	6.74345	6.92945	7.22555	7.62179	7.2278	7.75437	7.72406	7.16803	6.93829	7.58133	7.5443	7.37306	6.90171	6.74932	6.5166	7.14817	7.14294	7.27162	7.12036	7.62431	7.0691	6.08602	6.69102	5.73853	4.99875	4.98645
Norway		328.233	338.644	327.248	356.07	369.868	372.684	370.072	375.741	380.242	395.541	403.186	379.998	399.456	396.623	387.424	409.99	385.696	397.009	407.598	422.296	442.4	419.243	427.732	396.867	413.289	428.556	392.17	418.856	418.196	408.676	393.984	386.782
Oman		54.5506	55.006	63.6284	70.291	69.7816	79.3047	86.7013	86.0034	78.0611	97.2371	102.306	112.521	105.412	110.974	114.046	104.923	105.048	118.408	149.585	126.665	140.146	139.476	141.769	137.483	143.995	178.149	200.584	207.792	261.016	257.711	319.049	291.946
Pakistan		7.40921	7.53045	8.31005	8.17608	8.24692	8.54655	8.86284	9.26924	9.62667	9.82881	9.90254	10.2144	10.483	10.6436	11.7258	11.7845	12.101	11.9615	11.8625	12.1591	12.1113	11.4754	11.3147	11.7004	11.8308	12.6394	13.8341	14.1438	13.8346	13.8102	14.1506	13.5443
Panama		93.608	93.1545	86.2631	85.5801	85.9107	76.4722	77.2964	78.9307	76.1201	72.7768	75.4789	73.3886	72.9262	69.2616	78.8255	81.8086	71.869	72.4723	74.4241	71.951	71.1735	68.909	67.5351	64.35	73.1851	72.6735	71.6971	72.2868	45.6186	74.4765	86.4959	75.0842
Papua New Guinea		10.1971	9.91481	9.64917	9.68906	10.6453	10.8821	10.822	11.4869	10.5378	10.5337	10.3965	10.0493	10.2804	10.0299	9.46979	10.7337	10.8604	9.99871	9.79478	9.65202	9.46911	9.27247	11.9969	13.3393	12.8948	12.7992	13.0173	12.8437	10.138	9.72532	9.65966	8.99123
Paraguay		8.79556	8.35033	7.90403	8.29289	8.86183	15.1779	30.1197	43.5594	44.0133	53.0855	54.9357	56.659	51.8379	56.1844	64.2141	72.0998	73.2956	78.8906	78.4343	79.7812	79.3081	68.686	70.0985	72.9953	71.1676	69.151	70.6055	69.5728	71.3714	69.3019	68.6211	70.6626
Peru		23.3582	24.2375	23.6235	21.6095	21.7155	21.597	22.7092	22.5014	21.9471	19.2771	17.8506	17.3351	16.7192	17.3068	19.3103	19.8644	20.7354	19.6867	20.0594	20.1622	20.496	20.5703	20.6244	20.7097	21.476	22.5574	24.3903	24.4196	27.5259	26.1159	30.4291	29.595
Philippines		10.8612	10.2726	10.0968	9.54079	8.93744	8.42016	8.31576	9.08862	9.51112	10.3746	10.4177	10.1642	10.5614	10.6559	11.8797	12.4604	12.92	13.3645	13.406	13.9953	14.0302	13.5506	13.5083	13.6451	13.6968	12.8825	12.0543	12.2672	12.2919	11.8724	12.1693	12.3734
Poland		142.446	127.487	126.529	125.613	128.848	131.982	133.319	136.777	133.571	128.023	103.628	101.189	99.9396	103.15	99.0069	95.8805	107.172	105.678	99.5301	102.846	93.7662	89.4046	89.4046	92.5227	95.76	95.2715	99.9026	100.306	101.161	98.4329	105.277	105.678
Portugal		44.1296	37.4672	49.3569	50.6766	53.4785	54.1393	57.4575	59.3225	65.6506	70.5705	75.3535	75.4326	76.2361	77.1655	80.6216	83.5243	86.7798	89.926	95.269	99.5594	103.572	104.554	103.803	106.443	105.698	105.284	102.351	104.33	100.23	99.7099	104.074	99.1703
Puerto Rico		133.226	138.975	100.966	96.7132	107.264	91.9124	98.8024	101.818	92.1431	89.0848	84.8585	104.721	92.7614	85.4406	97.5246	98.7678	100.483	102.228	104.087	86.1688	115.648	125.265	125.957	135.869	138.605	134.442	135.167	124.907	111.922	105.416	100.919	97.5861
Qatar		935.45	838.907	947.811	792.088	859.429	710.349	687.454	678.104	666.713	665.849	790.287	885.22	1024.65	1116.34	1129.66	1104.35	1102.28	1114.06	1076.82	975.11	1007.58	748.391	749.367	794.365	854.427	911.409	862.248	801.668	763.799	731.588	739.024	790.339
Reunion		23.4317	24.5889	26.6639	29.4197	30.3361	30.6661	30.0981	32.2086	33.8759	36.9498	38.77	41.1851	41.9798	41.9705	50.6724	49.4167	50.1429	50.0074	61.5959	60.525	61.6085	63.2206	62.2545	61.4024	61.2226	61.5033	61.3108	61.9464	64.2583	62.6495	61.8163	59.1
Romania		124.354	124.201	129.156	131.54	128.181	128.251	131.097	133.773	131.436	135.888	123.107	96.7694	89.9668	82.1096	82.17	88.8221	90.6512	89.7702	77.1469	70.8575	70.6591	76.5314	75.2785	73.0453	75.939	74.9439	75.5979	75.1879	75.7071	63.8354	64.4793	68.9742
Rwanda		0.68968	1.21415	1.17731	1.28801	1.87992	1.88395	1.78224	1.77355	1.71649	1.72281	1.71345	1.69904	1.70554	1.14924	1.76997	2.13609	1.75805	1.551	1.51834	1.44038	1.46881	1.43211	1.40879	1.40275	1.28616	1.29826	1.25515	1.09254	1.12705	1.12831	1.10775	1.12552
Saint Kitts and Nevis		17.1215	18.0756	21.0721	17.2103	17.3134	17.3767	17.5124	18.6421	21.848	22.0516	22.1877	25.4881	25.3359	28.1623	33.0091	29.6475	33.2121	32.9373	32.5378	32.16	31.702	31.4241	31.0895	34.5243	37.7375	39.3872	52.589	72.7578	72.1543	75.0955	70.5965	70.0128
Saint Lucia		13.4066	10.4601	12.367	11.2027	11.0751	13.4421	13.3446	14.7513	17.8574	17.7746	17.6374	17.4333	17.7871	16.0053	19.2533	19.3061	19.0356	19.7732	19.6021	19.4614	30.7285	32.0046	32.4246	35.4039	34.0341	33.8151	34.6387	36.8433	37.6979	36.6171	38.1039	37.9657
Saint Pierre and Miquelon		366.444	366.977	335.704	363.187	354.116	310.765	385.896	489.64	508.463	579.019	567.224	537.843	499.802	272.69	285.238	189.847	189.18	129.419	149.858	149.788	163.57	151.081	152.036	166.906	181.257	188.579	191.656	200.351	202.04	203.826	212.956	214.48
Saint Vincent/Grenadines		7.4445	6.93254	7.36666	7.28216	7.20819	8.14249	8.30992	8.96729	10.5666	13.9371	13.1638	11.5586	12.9632	11.5209	18.3911	19.1992	19.1619	20.3074	24.0734	24.143	24.8969	24.8634	26.4595	27.701	29.8268	29.8763	29.3021	29.7806	29.9681	30.0106	31.1538	31.1546
Samoa		9.10902	9.55245	10.6351	10.6452	13.8303	11.2332	11.4558	11.3063	11.2386	11.9099	12.3902	12.3294	12.7826	12.6758	12.0838	12.8259	12.9338	13.0091	13.1877	13.3772	13.2635	13.9579	15.0743	14.4724	14.5147	15.1228	14.7711	14.9219	14.8439	14.9951	14.8786	14.8788
Sao Tome and Principe		5.75859	5.6113	5.61526	5.30415	5.41071	5.44772	5.26205	5.24723	5.11753	5.02657	9.0483	9.28341	9.43647	8.86442	9.50346	9.33734	9.1432	8.98143	8.72421	8.69268	9.80326	9.19002	9.41524	9.26947	8.9441	8.92263	9.82946	9.43231	9.95848	10.3581	10.9245	10.97
Saudi Arabia		165.973	190.037	174.281	177.634	195.666	203.313	215.356	210.164	208.989	197.512	208.421	214.589	214.738	164.952	214.282	203.983	212.737	220.28	223.484	221	227.702	235.763	241.695	253.321	267.573	276.031	284.366	281.505	297.558	302.952	323.332	339.015
Senegal		6.59078	6.23186	6.21022	5.78396	6.70647	6.40912	6.16378	6.04349	5.02547	5.07379	4.93029	4.43935	5.25675	4.34895	6.28975	6.60236	6.45852	5.79303	6.00618	6.45635	6.72329	6.55038	6.6745	6.68544	7.44285	7.75063	7.73265	7.82877	7.74524	7.19529	7.42875	7.34919
Seychelles		49.4731	39.1684	35.8139	61.4768	64.016	64.9795	64.5897	68.168	93.5013	97.9811	88.9708	94.6251	96.0702	96.8109	97.7597	97.3455	96.0756	102.336	101.316	100.067	102.385	104.121	149.754	144.448	147.968	144.18	192.537	157.439	169.517	182.126	163.552	162.018
Sierra Leone		3.16999	3.1245	3.2849	3.03444	2.95731	3.15007	3.32297	3.48959	3.7106	3.61428	3.50481	3.5835	2.67197	2.28138	2.64518	3.13348	3.18309	3.30063	3.33034	3.3394	3.50611	3.37744	3.24115	3.18166	3.65434	1.4933	1.99215	1.7105	1.74524	1.82957	1.96583	1.88142
Singapore		182.985	182.53	184.914	181.224	187.287	181.113	208.041	226.821	235.781	247.79	263.98	272.922	299.538	287.932	338.771	333.735	369.84	386.173	388.908	375.853	375.712	388.732	374.221	385.411	423.043	469.248	503.278	530.057	519.992	512.548	558.906	578.607
Solomon Islands		6.3527	8.72089	7.63788	8.18494	7.95424	6.71596	6.51709	7.28416	7.73835	7.78941	7.68021	7.4407	7.06402	6.32228	6.41925	6.45952	6.25152	6.08604	5.91155	5.74509	5.77419	5.63191	5.67367	5.52381	5.53241	5.93927	5.36432	5.84597	5.51287	5.49095	5.45984	5.34416
Somalia		2.85749	3.30874	3.24381	3.07719	3.08778	2.92264	2.98968	2.14701	2.17964	2.26789	2.09497	1.29136	1.26929	1.25702	1.28168	1.25439	1.22128	1.18929	1.14837	1.10872	1.33115	1.28568	1.24543	1.21928	1.16639	1.53467	1.50697	1.26041	1.23145	1.16996	1.18424	1.16542
South Africa		93.2694	97.9796	101.414	99.1535	104.058	102.646	103.063	102.05	102.758	94.3287	91.5738	93.5442	93.8347	89.7546	98.0306	97.3247	97.333	105.11	98.9332	100.238	101.716	101.963	98.4393	104.709	110.881	107.846	110.328	112.448	120.342	115.104	115.484	115.393
Spain		81.2006	81.854	87.7156	89.5464	84.7418	86.6013	87.6375	89.8742	95.8738	98.3764	99.6918	105.088	104.157	101.443	105.302	108.499	110.665	117.696	122.897	128.358	135.502	140.162	140.027	144.91	147.519	149.203	147.852	148.969	142.241	131.895	134.265	130.797
Sri Lanka		5.86463	5.83348	5.96279	5.79104	6.81706	6.04897	6.12797	6.33974	6.01557	5.72197	6.26463	6.19257	6.22781	6.81358	7.69729	8.16853	8.04532	8.78499	9.0332	9.57069	9.94561	9.67877	9.68823	10.1593	9.99456	10.9227	10.6566	10.995	10.5535	10.0781	11.558	12.6658
Sudan and South Sudan		2.68591	2.76801	2.88835	2.70235	2.44239	2.69602	2.93965	2.78822	2.9098	2.71315	2.64168	3.47412	3.15644	2.65648	2.60345	2.3981	2.36415	2.35723	2.31262	2.44072	3.23577	3.96975	4.00204	4.29621	4.50003	4.71422	5.11937	5.69216	5.96937	5.87657	7.01486	6.69117
Suriname		114.598	98.6604	94.2012	65.154	60.4321	72.0644	65.0991	47.2105	54.519	72.9671	83.0203	84.3778	82.1942	81.0591	83.5067	79.3403	77.4914	77.523	76.689	75.7542	63.0759	65.1426	66.6641	66.9127	67.8335	69.4214	70.4917	69.9177	68.5693	67.9032	80.4768	78.5929
Swaziland		16.5053	15.2412	14.2446	10.9431	12.3985	14.9176	13.8529	14.6984	14.7969	14.8134	13.8992	13.2146	12.7178	11.2436	15.8346	15.6149	14.1057	15.7124	15.3036	15.0159	14.3087	14.1096	13.9099	12.5561	11.7667	11.3999	12.4654	14.0541	14.3708	13.4406	13.4737	12.6737
Sweden		249.625	245.415	226.11	232.623	243.342	259.387	262.344	269.212	263.318	257.853	257.997	255.48	257.478	255.925	255.849	260.142	255.646	260.482	269.905	265.778	254.473	269.01	254.302	241.193	258.687	260.021	247.14	249.78	244.279	227.339	242.588	235.846
Switzerland		178.426	164.552	159.958	167.094	162.634	175.897	176.315	175.59	177.055	170.227	172.599	176.606	176.409	173.578	174.955	173.044	168.97	171.536	175.231	183.07	178.125	184.649	174.841	175.908	174.233	169.453	171.809	170.477	173.311	167.266	169.531	157.529
Syria		31.3113	31.9518	31.4525	34.3079	36.4847	36.7779	35.385	38.6608	38.875	40.0354	45.0227	40.2853	40.3999	39.839	45.0571	42.1572	43.9368	45.5887	48.0837	48.1753	47.4802	45.1419	47.3821	46.6844	46.6203	43.3768	41.8014	41.4197	45.8321	45.3268	45.7327	41.6857
Taiwan		62.5744	58.8821	57.8498	64.9061	73.9985	75.317	79.5695	84.1915	89.988	94.8424	99.9825	102.105	105.821	101.514	122.273	133.127	141.351	146.757	154.151	161.143	171.666	172.623	182.092	188.807	194.261	195.34	200.308	211.278	203.063	198.476	212.397	209.865
Tanzania		2.09233	2.27533	2.17677	1.9618	2.03129	2.00701	2.23215	2.00168	2.05961	2.06118	2.19723	1.95148	1.9795	1.96338	1.75122	1.68137	1.73154	1.57865	1.75844	1.80824	1.75344	2.00681	2.13627	2.09226	2.18466	2.31955	2.32155	2.65252	2.7617	2.83326	2.74896	2.66395
Thailand		10.7997	11.3586	10.8961	11.4232	12.4768	13.6703	13.8577	14.9845	16.9078	19.7194	22.7279	24.5058	25.8826	27.4564	32.153	35.9481	41.1103	43.071	40.0356	40.7364	41.5436	43.1606	46.6489	50.6424	53.9591	58.5533	60.2912	62.0059	62.5015	64.5082	67.6017	74.0013
Togo		3.65913	3.32002	3.1917	3.19613	3.63663	3.43243	2.80964	2.59782	2.61477	2.88763	2.77393	4.37248	3.09233	2.62587	2.827	2.92521	2.68783	2.44766	2.5991	3.58408	4.38927	3.09352	3.89855	5.90731	6.08954	5.86954	5.9374	6.22035	3.5205	3.4542	5.46825	3.61091
Tonga		4.72731	6.88841	6.38479	6.80789	6.80229	7.02479	6.99686	10.2227	12.0587	12.9789	12.9456	14.7174	14.6049	14.5369	17.0223	16.9879	18.7153	19.1329	18.518	18.3889	18.6611	17.6354	15.6716	15.5738	16.6789	20.1167	23.6698	24.1363	24.3162	23.9506	23.8729	23.2294
Trinidad and Tobago		159.675	150.847	148.843	161.047	214.543	230.49	170.334	156.37	159.662	170.295	180.27	200.795	196.258	208.827	246.063	257.365	284.264	308.772	308.116	317.704	335.963	379.116	401.32	433.742	476.062	544.415	665.111	668.482	729.073	691.177	768.207	757.549
Tunisia		19.8836	21.355	19.9371	22.3327	23.2533	23.1643	23.9325	21.7985	22.682	25.2952	24.6076	23.6513	22.3709	23.0056	26.9524	23.7244	25.4554	29.128	30.8582	30.7717	31.656	34.9909	34.8569	33.7112	33.6554	35.7806	32.9759	28.8101	29.7575	28.8165	29.3707	30.6978
Turkey		23.1057	21.1111	23.6904	23.8893	24.5951	26.1593	28.7339	31.0937	31.3506	32.5075	34.8848	35.8088	36.2217	38.9232	36.6328	40.1989	43.6055	45.6516	45.9427	43.8563	46.8458	42.1478	45.0887	46.7323	48.7534	51.0403	54.7959	58.2359	55.9795	55.2516	57.6893	61.4098
Uganda		1.32637	0.92346	1.02707	0.94995	1.00904	1.03042	1.0665	0.92453	1.15068	1.11305	1.17291	1.22066	1.31039	1.20321	1.27457	1.2587	1.25796	1.30099	1.35958	1.31792	1.43224	1.48103	1.49643	1.54928	1.55795	1.54783	1.40283	1.51311	2.2833	1.96328	1.98381	1.87652
United Arab Emirates		267.229	407.789	363.803	422.542	452.97	584.59	627.179	699.893	722.766	736.673	673.143	770.208	784.922	669.373	643.352	653.611	641.942	644.886	634.192	610.164	579.724	558.521	578.864	565.242	569.162	632.883	640.042	688.558	747.073	717.249	719.105	728.423
United Kingdom		156.99	151.044	148.615	149.131	149.731	154.352	156.828	158.957	158.547	162.316	161.478	165.347	160.605	165.413	164.363	162.468	172.22	166.766	165.997	166.233	164.51	166.415	163.53	163.69	163.864	162.266	159.584	152.991	150.204	140.885	143.074	134.485
United States		343.566	331.665	315.539	312.118	324.952	321.079	319.186	326.282	338.28	343.515	338.451	333.772	334.418	336.35	338.588	341.857	349.013	346.977	344.45	346.373	350.204	337.469	339.487	337.61	342.073	339.343	333.899	336.344	326.518	308.36	315.183	312.786
Uruguay		37.3168	35.1633	33.1828	40.2428	38.9189	35.9312	37.5346	39.9584	38.8451	34.0992	43.4802	38.6134	43.9901	41.6569	44.1257	39.6054	40.7236	44.598	55.5526	49.7919	51.0853	50.2027	51.9644	49.9558	43.2508	48.022	45.4847	54.2257	56.0693	57.5558	62.9329	57.2865
Vanuatu		14.7357	12.5064	12.19	11.5007	11.7833	12.3877	12.0959	11.2234	12.9098	11.2106	11.4746	8.80718	5.68107	5.29566	5.44733	5.33387	5.21239	5.12475	5.02803	4.93637	6.16275	6.01825	6.30128	6.13993	6.14708	6.40883	6.07149	6.88458	6.12398	7.30061	7.21062	8.17779
Venezuela		107.551	113.622	111.813	104.679	103.576	102.509	108.124	107.372	105.377	109.399	107.987	111.726	109.542	100.004	115.344	114.616	117.318	119.028	125.438	114.447	117.862	127.099	121.295	110.611	117.903	118.902	126.643	112.612	118.81	115.51	118.556	117.232
Vietnam		3.53554	3.47743	3.66842	3.63332	3.57924	3.90128	3.47245	3.86181	3.45873	3.96203	4.17265	4.34156	4.40141	5.30672	5.64821	6.87868	8.05882	7.67445	7.92812	8.74446	9.29646	10.1377	11.0988	11.8594	13.2947	14.8454	15.4835	16.9812	18.6499	20.6358	22.6103	24.559
Virgin Islands, U.S.		2507.34	2242.77	1624.75	1138.99	1328.52	1484.74	988.316	1162.79	813.173	1237.82	1115.27	1133.08	1147.55	798.104	1145.12	1130.06	1115.17	1135.44	1175.14	2820.77	1276.12	1770.95	1762.82	2077.77	2173	2082.26	2218.91	2076.72	1746.13	2091.74	2003.73	2180.14
Virgin Islands, British		29.4599	44.6507	43.2208	41.5919	36.8537	36.6381	38.7857	43.7756	45.0879	46.5125	44.8881	43.296	43.9853	42.247	40.7588	39.3132	42.3931	41.0474	39.709	38.4729	37.178	36.1648	35.1734	39.6655	48.8861	51.0506	52.7802	55.7174	58.9511	54.497	82.1809	53.9713
Western Sahara		19.0015	16.8885	17.0757	15.421	15.3483	15.0507	14.513	14.4034	14.0314	13.543	13.6318	13.126	12.7858	11.5319	11.5548	11.878	11.2571	10.74	10.2312	9.75886	10.7162	10.399	9.95473	9.53891	9.09925	9.92628	8.47576	8.58844	7.83906	7.66219	7.42039	6.87262
Yemen		10.5216	10.4128	11.8625	10.4798	12.9144	13.9173	12.9858	12.4985	12.4122	12.8804	12.9066	12.8841	12.9145	9.26939	9.56534	10.085	9.95585	10.0306	10.4563	10.6106	11.1259	11.4482	12.179	12.7753	12.481	12.6222	13.3779	11.8314	14.0588	12.6553	15.4188	12.448
Zambia		23.9568	23.4807	23.2787	21.9124	20.7512	19.9259	19.2113	17.2146	17.0231	13.977	14.6644	13.7629	13.9856	12.5311	11.8405	11.6658	10.9389	11.6522	10.8117	10.223	9.94009	10.1966	10.2278	10.3139	10.3393	10.6777	10.8756	10.5359	9.7305	9.88649	10.3172	10.6447
Zimbabwe		20.2333	19.5463	18.3806	18.2745	17.5319	17.9683	19.3588	21.3817	20.0384	21.0553	22.662	23.3762	22.2433	19.0177	18.0721	17.8313	18.0238	17.4459	17.2352	19.3994	17.9482	16.8036	16.84	16.6908	15.0003	15.8267	15.7942	15.3534	13.3364	13.3124	13.7946	13.5126
